# Supplementary material for: Vertical mobility of pyrogenic organic matter in soils: A column experiment
Source: Copernicus journal article supplement (doi:10.5194/bg-2020-276), 2020-08-03
Supplement: Supplementary file [file bg-2020-276-AC2-supplement.pdf]

Authors responses

**Interactive comment on “Vertical mobility of pyrogenic organic matter in soils: A column experiment” by Marcus Schiedung et al.**

**Anonymous Referee #2**

Received and published: 5 October 2020

You find our final authors responses written in blue

General comments:

This paper is of high relevance, well written and provides interesting data which are certainly of interest for the readers of Biogeosciences. It is a follow-up of several previous publications, describing investigations about vertical transport in soil systems. Below, some of those publications which are not cited, but could contribute to the discussion of the present paper are mentioned. An important issue which has to be considered is the fact that there is no good distinguishing between Pyrochar (Biochar) and PyOM produced during vegetation fires. Of course both are pyrogenic organic matter, but biochar is produced under pyrolysis conditions. Such conditions may occur during peat smoldering or in subsoil fires but rarely occur during above ground fires. Although in both cases highly aromatic material is produced, there are chemical differences which may be mainly related to a more complete oxidation process during combustion in comparison to pyrolysis. This is also evidenced by the fact that combustion at 450°C is in the most cases complete and no charred remains will accumulate. However, this does not decrease the value of the present paper, since pyrolysis-derived PyOM is still PyOM and this material is in soil since it is recommended to be used as soil amendment. Therefore, I recommend to correct the definition of PyOM in Line 30 and to include Pyrochar (biochar) into this definition to make it a bit more general. As a consequence, some aspects of Pyrochar may enter the introduction. Indeed, at some places the latter is already done, although I assume that this happened unintentionally, but still a clear differentiation is needed. Below you can find some additional comments. After following those suggestions, I think the paper can be published.

We thank the reviewer for the general positive feedbacks and for the useful suggestions for our manuscript. We agree that we need to include a better definition and differentiation between artificially pyrolyzed and natural PyOM which is a product from wildfires. Therefore, we will change the first sentence of the introduction to: "Pyrogenic organic matter (PyOM) is a product of artificial (biochar) or wildfire induced incomplete combustion.". We will also follow the suggestions below to state clearly that we used artificially pyrolyzed PyOM in our experiment and highlight the associated limitations.

Specific comments:

31: There are many indications that the age of PyOM is by far lower than 10 000 years (Santos et al., 2012)(Hockaday et al., 2006) . Since the “real” MRT of this material is still under discussion, it should not be stated here as a proven finding.

The first section of the introduction of the current manuscript provides an overview of the PyOM in the Earth system before it narrows down to the soil system. Therefore, the given residence time of >10,000, which is reported in the cited literature (e.g. Coppola et al 2018; Masiello and Druffel 1998), represents a residence time of PyOM in the Earth system. If we are not mistaken, the reviewer refers, with the suggested study from Santos et al. (2012), to the residence time in soils. We start to discuss the current knowledge of PyOM residence times in soils from the paragraph line 46-51 and following. Here we state that the MRT of PyOM is higher than the MRT of non-pyrogenic soil organic matter (line 47). However, we agree that this is still an open discussion and PyOM is also reported with lower MRT in soils. Thus, we will change line 47 as followed and include the suggested literature: “Pyrogenic organic matter is found with residence times in soils of several centuries to millennia, which is much more than the average age of SOC and is mainly attributed to its condense and aromatic composition and thus increased stability against degradation (Kuzakov et al., 2014; Santos et al., 2012; Schmidt et al., 2011; Singh et al., 2012).” The suggested literature, Hockaday et al. (2006), is already cited and included in our discussion (line 352-355). Since this publication is not reporting MRT, we think it is better not to cite it there, but, we agree that this study should be included in the introduction. We will add in line 66: “In addition, it is reported that PyOM found in fire effected watersheds underwent aging processes in soil prior to its export from the soils to the riverine system (Hockaday et al., 2006).”

48: Considering an atomic H/C ratio of 0.5, one cannot talk about highly condensed (Every second C is connected to a H)

We are sorry for the misunderstanding. We did not mention in our text a H/C ratio of 0.5 and we are not addressing any aspect directly related to specific degree of aromaticity or condensed structure here. We will remove the “highly” in line 47 to avoid confusion. We already included this change in our response to the previous comment. Furthermore, we will include the actual H/C and O/C ratios in Table 2 as it was recommended by reviewer 1. We are currently measure the H and O content but first results indicate that the H/C ratios are rather ranging between 0.1-0.2, indicating a higher degree of condensation than mentioned by the reviewer.

51: The article by Velasco-Molina et al. (2013) is very closely related to the subject of the present paper and may be included into the discussion.

We agree that the study from Velasco-Molina et al. (2013) is supporting the assumption that vertical transport in soils is determine the long-term fate of PyOM in soils. However, we cite a very recent review from Hobley (2019) which already includes the mentioned study. In order, to be consistent, we will remove the citation of Foereid et al. (2011) and Leifeld et al. (2007) because these are also discussed in the review from Hobley (2019).

52: Change to physical and chemical, because the term physico-chemical is normally related to physical aspects of chemistry (i.e. thermodynamics etc.), which is definitively not the case here.

Will be changed as recommended by the reviewer

53: As mentioned above, pyrolysis is a process in which heat is applied in an oxygen-free or depleted environment. This is not the case during above ground vegetation fires. Here the vegetation is mostly combusted and the residues accumulate due to incomplete combustion (as mentioned in the introduced definition). During combustion, condensation is unlikely. In addition, the open space during a vegetation fire will decrease the probability that two volatiles can “meet” for recondensation”. Only if volatilize move vertically in the soil, they may form a layer of recondensed OM. I guess the authors are referring to biochar, but this is not really clear. However, here one has to bear in mind that modern biochar production allows the removal of the syngas which prevents condensation reactions within the biochar.

We agree that condensation can be interpreted in different ways and we do not provide a clear definition here. To avoid confusion, we will change line 53 to: “Pyrolysis affects the chemical and physical properties of the feedstock organic matter which result in a high porosity and large surface areas depending on the fuel biomass, duration and production temperature (Hammes and Abiven, 2013; Lehmann et al., 2015; Preston and Schmidt, 2006).” Further, we will include an additional reference which we missed in the current manuscript but supports the given statement: Lehmann, J., Abiven, S., Kleber, M., Pan, G., Singh, B. P., Sohi, S. P., & Zimmerman, A. R. (2015). Persistence of biochar in soil. In J. Lehmann & S. D. Joseph (Eds.), *Biochar for Environmental Management* (Issue January, pp. 235–282). Routledge. <https://doi.org/10.4324/9780203762264-17>

59: High aromaticity is not necessarily equal to high molecular weight and it is also not clear why high molecular weight should cause strong sorption to soil minerals. At least a reference is needed where the interested reader could get to know the included mechanisms.

We are sorry for the misunderstanding. We did not want to say that high aromaticity is equal to a high molecular weight here. We state that PyOM is rich in aromatic compounds and thus will most probably have a higher sorption affinity to the mineral surface. This is discussed in the discussion section (line 450). We agree that this statement requires further references and we will include here: Kaiser, K., & Guggenberger, G. (2000). The role of DOM sorption to mineral surfaces in the preservation of organic matter in soils. *Organic Geochemistry*, 31(7–8), 711–725. The authors identified that the sorption of organic matter is depending on its chemical structure and compounds containing aromatic structures (such as lignin) have a higher sorption affinity than less aromatic compounds.

98: As mentioned above, material which is pyrolyzed is not necessarily the same as material that was partially combusted. In our laboratory we have seen that material that is pyrolyzed at low temperatures (< 500°C) contains more alkyl C than the same residues combusted at 350°C (with higher temperatures complete combustion occurs). This has to be considered in the discussion. Thus, in the present work, biochar was tested rather than charcoal that is produced during a vegetation fire.

We agree that partially combusted and artificially pyrolyzed PyOM differ in several properties. Actually, we already included this in our current discussion line 336:” Artificially produced PyOM is mostly more stable than naturally produced PyOM, which challenges the use of one type as a proxy for the other (Santín et al., 2017).” We agree that this needs to be addressed again in the mentioned section. Therefore, we will change this to: “The ryegrass was oven dried at 40°C and pyrolyzed at 450°C for 4 h under N<sub>2</sub> atmosphere (Hammes et al., 2006). Three

independent growing batches of the initial ryegrass were pyrolyzed separately which were used in our experiment as a proxy for PyOM (Table 2).”

216: Most pH-meters are not exact enough to “trust” in the second post-coma digit. Thus, in the most cases it doesn’t make sense to consider this digit (change to 0.2 and latter to 0.3-0.5)

Will be changed as recommended

293: The sentence Hilscher and Knicker. . . is not clear: what means “exported from the soil”?

Hilscher and Knicker (2011) reported that 0.4% of initially applied PyOM were found in the outflow of soil columns (8cm length) in a one-year incubation experiment. We will clarify this here and change to: “Hilscher and Knicker (2011) reported that 2.3 % of added PyOM migrated to 5 cm depth and 0.4 % were leached from soil columns (8 cm length) and found in the column outflow in a one-year incubation experiment.”

301: The cited reference Hilscher et al. showed that PyOM from rye grass can be biochemically degraded. So why should this not be possible for the comparable material used in the present study? In the study by Velasco-Molina et al (mentioned above), the PyOM in the deeper soil horizons of a fire-prone region was highly oxidized and it was suggested that this oxidation facilitated the vertical transport. A comparable scenario may have happened here.

We agree that biochemical degradation and the associated oxidation of PyOM is an important factor controlling the vertical PyOM mobility in soils. This was also clearly shown with our experiment and the higher mobility and reactivity of the oxidized PyOM. In fact, we designed the experiment according to the existing information in the literature which reported higher mobility of aged and oxidized PyOM. In order to include aged PyOM, we used the accelerated aging as described by Cross and Sohi (2013). Due to the comparable short duration of our experiment (five days of percolation - line 119-121), we can assume that an additional biochemical degradation of the PyOM is negligible.

306: I have some problems to follow the argument. How can physical fragmentation break the bonds of an aromatic network? I think this would only work chemically. In addition, I have some problems to understand how such chemical breakdown of covalent bonds could work in soils, since such reactions need activation energy and rarely occur without catalysts or heat. What is the mechanisms behind the formation of colloids from PyOM? The authors did some Infrared on the starting material. A second analysis of the aged PyOM may deliver some more details and support the given hypothesis.

The physical fractionation discussed here and also discussed in the cited references (Hobley, 2019; Pignatello et al., 2015) takes place on a larger scale than mentioned by the reviewer. In the above references, it is reported that centimetric to millimetric PyOM particles will breakdown into smaller particles (sub millimetric) due to physical breakdown with time. This is a process happening rather on the scale of cm to  $\mu\text{m}$  than at the molecular scale. The formation of colloids and PyOM particles aggregation is controlled by the surface interaction of the PyOM. According the cited literature in line 308 (Castan et al., 2019; Sigmund et al., 2018), the aggregation is controlled by van der Waals attraction and electrostatic repulsion. The mid-infrared spectra of the fresh and oxidized PyOM showed an increase in functional groups with oxidation (Section 2.2 and Fig. 1). As mentioned above, further degradation should be negligible due to the short duration of the experiment, so we did not measure the mid-infrared spectrum of the PyOM after the experiment.

318: Again: Be careful with the term pyrolysis. This term is correct for the present paper, but does not describe the situation during natural vegetation fires described by Santos et al., or Rumpel et al., and as far as I understood, the material produced by Hilscher et al.. I also wonder about the mechanism about the production of mobile PyOM during combustion. I assume, the mobile phase would be composed of smaller molecules located within the aromatic network of PyOM which are washed out by water. But considering the hydrophobic nature of PyOM, I wonder how water can enter the porous system of the char to do its job and how the mobile material (which should also be hydrophobic due to its aromatic nature) gets dissolved in water. I wonder if a kind of preferential flow is more likely to explain the observed vertical translocation

We agree that the term pyrolysis is correct for the PyOM used in our experiment. Our experiment did not allow to specifically investigate the mechanism of the PyOM mobilization by the percolating water because we determined the mobile fraction as a sum of dissolved and particulate PyOM. Our breakthrough curve analysis, however, indicate the absence of preferential flow (See also supplement material) and that the application of PyOM did not change the hydraulic properties of the soil column compared to the controls. Santos et al. (2017) concluded with their field observations that also natural PyOM may contain easily mobilized fractions which are mobilized with the first flush after the fire. However, the quantification of this initial pulse of PyOM flux was up to now mostly missing in the literature. We were able to capture this first pulse of mobilized PyOM in our experiment, which contributed to up to 84% of the total mobilized PyOM.

336: Do the authors have a proof of the statement that artificially produced PyOM is more stable than naturally produced PyOM? From a chemical viewpoint it does not make a lot of sense since the chemistry during combustion depends on the temperature and the chemistry of feedstock, irrespective of being created in the lab or in nature. Thus, PyOM of grass produced in the lab should show the same biochemical stability as material produced in nature, if it was subjected to the same temperature. However, again under natural conditions, PyOM is unlikely to have been produced at 450\_C because at that temperature most of the organic matter had been volatilized. Thus, the differentiation between artificial and natural PyOM should be according to pyrolyzed and combusted charcoal. Nevertheless, I am not aware of degradation studies proofing the higher stability of “lab-made PyOM” (produced at the same temperature). If they exist, they should be referenced.

The cited study by Santín et al (2017) provides an extensive and direct chemical comparison of natural and artificially pyrolyzed PyOM produced at similar temperatures and similar feedstock (e.g. degree of aromaticity, H:C, O:C, recalcitrance index). The authors identified that slow-pyrolysis compared to the fast combustion during wildfires resulted in a higher stability of the artificial PyOM. Therefore, the authors concluded that the use of PyOM from pyrolysis as a proxy for natural PyOM may be limited.

In order to be more specific, we will change the mentioned line 336-337 to: “Artificially produced PyOM is reported to have a higher stability than PyOM naturally produced during wildfires, which challenges the use of one type as a proxy for the other (Santín et al., 2017).”

345-360: I think the results given here, are in good agreement with the study of Velasco-Molina et. al. (2013), showing that PyOM dominates the deeper horizons of a soil in a fireprone region and that this PyOM is highly carboxylated.

We thank the reviewer for providing the additional literature which we will integrate to support our findings with field observations described by Velasco-Molina et al. (2013)

365-370: A conceptual model describing this mechanism very nicely has been published in (Knicker, 2011). It may be worth to be considered in the discussion, because it already describes a considerable part of the explanations given here. There is a further very recent publication by (Miller et al., 2020), which may be supportive in the discussion of the present paper.

We thank the reviewer for further literature to strengthen our discussion and to include the existing conceptual model described by Knicker (2011).

Conclusion and implementation: This part is rather a summary than a conclusion. I am missing the description of the implication the obtained results may have for our understanding of PyOM in soils. Does the mobility of PyOM affect the aquifer? Is there an environmental threat? What may happen based on the findings of the present paper?

We think that a discussion of direct effects on aquifers and environmental threats would be too speculative with our small scale experiment. This would require more research under field conditions and on larger scale. Therefore, we will emphasize this by adding the following: “Further research is needed to understand the fate of PyOM under unsaturated and field conditions and larger scales such as pedon and catena. We identified that the vertical PyOM mobility is highly depending on soil properties and the degree of PyOM oxidation (age) which increases not only its mobility, but also reactivity in soils and influences its effect on nSOC. This will influence its dynamics in the vadose zone and between the terrestrial and aquatic systems.”

Suggested literature:

Hockaday, W.C., Grannas, A.M., Kim, S., Hatcher, P.G., 2006. Direct molecular evidence for the degradation and mobility of black carbon in soils from ultrahigh-resolution mass spectral analysis of dissolved organic matter from a fire-impacted forest soil. *Org. Geochem.* 37, 501–510.

Knicker, H., 2011. Pyrogenic organic matter in soil: Its origin and occurrence, its chemistry and survival in soil environments. *Quat. Int.* 243. <https://doi.org/10.1016/j.quaint.2011.02.037>

Miller, A.Z., De la Rosa, J.M., Jiménez-Morillo, N.T., Pereira, M.F.C., Gonzalez-Perez, J.A., Knicker, H., Saiz-Jimenez, C., 2020. Impact of wildfires on subsurface volcanic environments: New insights into speleothem chemistry. *Sci. Total Environ.* 698, 134321. <https://doi.org/https://doi.org/10.1016/j.scitotenv.2019.134321>

Santos, F., Torn, M.S., Bird, J.A., 2012. Biological degradation of pyrogenic organic matter in temperate forest soils. *Soil Biol. Biochem.* 51, 115–124. <https://doi.org/http://dx.doi.org/10.1016/j.soilbio.2012.04.005>

Velasco-Molina, M., Knicker, H., Macías, F., 2013. The potential of humic material in sombric-like horizons of two Brazilian soil profiles as an efficient carbon sink within the global C cycle, *Functions of Natural Organic Matter in Changing Environment.* [https://doi.org/10.1007/978-94-007-5634-2\\_78](https://doi.org/10.1007/978-94-007-5634-2_78)

Literature which will be added

Kaiser, K., & Guggenberger, G. (2000). The role of DOM sorption to mineral surfaces in the preservation of organic matter in soils. *Organic Geochemistry*, 31(7–8), 711–725. [https://doi.org/10.1016/S0146-6380\(00\)00046-2](https://doi.org/10.1016/S0146-6380(00)00046-2)
